# Supplementary material for: An approach to estimate the contribution of signal noise to the diameter uncertainty of individual silver nanoparticles and resolution of spICP-MS analysis
Source: Royal Society of Chemistry journal article supplement (doi:10.1039/d2ja00039c), 2022-01-01
Supplement: d2ja00039c1.xlsx [file d2ja00039c1.xlsx]

## Sheet: Sheet1
	Legend		cells where the user enters data
			Information concerning analyte in NPs
		calculated value
	Table 1 Calculation of the dilution factor of NPs suspension and dynamic calculation of the probability for particle coincidence
	Analyte	Ag	Density (g/cm3)	10.49
	Atomic mass (g/mol)	107.868	Analyte mass fraction	1				0.05
	Diameter (nm)	40	No atoms/NPs	1.96151e+06			1	4.75615	0.0475615
	Total conc. of analyte sample (mg/L)	20	No NPs /ml	5.69241e+10			2	0.118904
	Sample inlet flow (mL/min)	0.342	Expected No of peaks	1.90787e+09			3	0.00198173
	Transport efficiency	0.098	No data points for acquisition	20000			0	95.1229
	Dwell Time (ms)	3	Desired No of peaks	1000
	Acquisition Time (s)	60	DF	1.90787e+06
	1A) Poisson statistic Module	Particle events	Number of observed peaks	Poisson probability to observe NPs for given dt (%) :	% Recovery of Particle events
		1 NPs	951.229	95.1229	95.1229
		2 NPs	23.7807	2.37807	4.75615
		3 NPs	0.396346	0.0396346	0.118904
	Table 2 Calculation of the ionic standard concentration of that deliver an analye mass corresponding to a pre-selected nanoparticle diameter at given measurement parameters
	2 A) converstion of pre-selected NP's diameter to corresponding conentration of analyte ionic soliton	d (nm)	Corresponding ionic standard concentration (ng/L)
		20	26.2073
		30	88.4495
		40	209.658
		50	409.489
		60	707.596
		70	1123.64
		80	1677.26
		90	2388.14
		100	3275.91
	2 B) calculation of the size of NP to corresponding the pre-selected conentration of analyte ionic soliton	Corresponding d (nm)	Ionic standard concentration (ng/L)
		18.2768	20
		24.8054	50
		31.2528	100
		39.3761	200
		47.451	350
		56.7902	600
		65.0085	900
		71.5511	1200
		78.7522	1600
